# Supplementary material for: Subclinical Myocardial Dysfunction in Patients with Persistent Dyspnea One Year after COVID-19
Source: MDPI journal article supplement (doi:10.3390/diagnostics12010057), 2021-12-28
Supplement: s1 [file s1]

Table S1. Baseline characteristics

| Demographics                                     | Total population<br>(n=66) | Dyspnoea +<br>(n=23) | Dyspnoea -<br>(n=43) | Ppvalue |
|--------------------------------------------------|----------------------------|----------------------|----------------------|---------|
| Age (years)                                      | 51.3±11.1                  | 51.0±11.3            | 51.6±11.1            | 0.836   |
| Gender (male, %)                                 | 45(68.2%)                  | 14(60.9%)            | 31(72.1%)            | 0.351   |
| BMI (kg/m <sup>2</sup> )                         | 27.6±4.7                   | 28.5±6.2             | 27.2±3.6             | 0.292   |
| <b>History</b>                                   |                            |                      |                      |         |
| Dyslipidaemia (n, %)                             | 13(19.7%)                  | 4(17.4%)             | 9(20.9%)             | 0.731   |
| Diabetes mellitus type 2<br>(n, %)               | 11(16.7%)                  | 3(13%)               | 8(18.6%)             | 0.564   |
| Obesity (n, %)                                   | 17(25.8%)                  | 7(30.4%)             | 10(23.3%)            | 0.525   |
| Smoking (n, %)                                   | 8(12.1%)                   | 2(8.7%)              | 6(14%)               | 0.533   |
| Cancer (n, %)                                    | 2(3%)                      | 1(4.3%)              | 1(2.3%)              | 0.648   |
| Chronic autoimmune<br>disease (n, %)             | 4(6.1%)                    | 2(8.7%)              | 2(4.7%)              | 0.512   |
| <b>Clinical characteristics at<br/>admission</b> |                            |                      |                      |         |
| Systolic blood pressure<br>(mmHg)                | 127.5±15.6                 | 129.3±13.9           | 126.5±16.5           | 0.497   |
| Diastolic blood pressure<br>(mmHg)               | 79.3±12.6                  | 84.1±12.8            | 76.7±11.8            | 0.022   |
| Heart Rate (bpm)                                 | 95.5±19.0                  | 101.2±15.8           | 92.4±20.1            | 0.075   |
| Respiratory rate                                 | 26.2±13.5                  | 29.7±20.8            | 24.2±6.6             | 0.273   |
| Temperature (°C)                                 | 37.5±1.0                   | 37.9±1.1             | 37.2±0.9             | 0.021   |
| SpO <sub>2</sub> (%)                             | 94.9±4.0                   | 94.8±3.7             | 94.9±4.2             | 0.900   |
| ICU admission (n,%)                              | 12(18.2%)                  | 3(13%)               | 9(20.9%)             | 0.429   |
| <b>Laboratory findings at<br/>admission</b>      |                            |                      |                      |         |
| Haemoglobin (g/dl)                               | 14.1±1.4                   | 14.1±1.5             | 14.1±1.4             | 0.945   |
| WBC (10 <sup>3</sup> /mm <sup>3</sup> )          | 7.1±2.8                    | 7.4±2.6              | 7.0±2.9              | 0.596   |
| NL ratio                                         | 6.1±4.1                    | 6.3±4.5              | 6.0±4.0              | 0.794   |

|                                             |               |               |               |       |
|---------------------------------------------|---------------|---------------|---------------|-------|
| CRP (mg/L)                                  | 130.9±88.6    | 145.1±83.0    | 123.3±91.4    | 0.344 |
| Troponin T (u/L)                            | 0.010±0.008   | 0.010±0.005   | 0.009±0.009   | 0.891 |
| Ferritin (µg/L)                             | 1215.0±1539.4 | 1528.1±2125.9 | 969.0±866.2   | 0.379 |
| D – dimer (ng/ ml)                          | 1045.6±1854.2 | 670.3±564.9   | 1260.1±2278.7 | 0.388 |
| INR                                         | 1.1±0.1       | 1.1±0.1       | 1.1±0.1       | 0.582 |
| LDH (U/L)                                   | 868.8±333.4   | 891.4±375.1   | 857.7±315.2   | 0.707 |
| Creatinine (mg/dL)                          | 0.8±0.2       | 0.8±0.2       | 0.8±0.2       | 0.306 |
| Lactate (mEg/L)                             | 1.0±0.4       | 1.1±0.4       | 0.9±0.4       | 0.120 |
| <b>Physical examinations at one year FU</b> |               |               |               |       |
| Systolic blood pressure (mmHg)              | 130.4±18.0    | 127.7±14.2    | 131.9±19.8    | 0.380 |
| Diastolic blood pressure(mmHg)              | 79.1±12.1     | 77.7±13.2     | 79.9±11.6     | 0.504 |
| Heart Rate (bpm)                            | 72.6±10.6     | 74.6±9.4      | 71.5±11.2     | 0.306 |
| <b>Spirometry at 6 months</b>               |               |               |               |       |
| Normal lung function (n,%)                  | 31(47%)       | 7(30.4%)      | 24(55.8%)     | 0.049 |
| Restriction pattern (n,%)                   | 19(28.8%)     | 9 (39.1%)     | 10(23.3%)     | 0.175 |
| Obstructive pattern (n,%)                   | 3(4.5%)       | 1(4.3%)       | 2(4.7%)       | 0.955 |
| <b>Spirometry at 12 months</b>              |               |               |               |       |
| Normal lung function (n,%)                  | 17(25.8%)     | 3(13%)        | 14(32.6%)     | 0.084 |
| Restriction pattern (n,%)                   | 8(12.1%)      | 4(17.4%)      | 4(9.3%)       | 0.337 |
| Obstructive pattern (n,%)                   | 3(4.5%)       | 1(4.3%)       | 2(4.7%)       | 0.955 |
| <b>Computed tomography</b>                  |               |               |               |       |
| Fibrosis (n,%)                              | 7(10.6%)      | 2(8.7%)       | 5 (11.6%)     | 0.712 |
| Residual ground glass opacity (n,%)         | 18(27.3%)     | 3(13%)        | 15(34.9%)     | 0.058 |
|                                             |               |               |               |       |
| Total length of hospitalization (days)      | 12.0±10.7     | 11.4±10.5     | 11.9±10.9     | 0.857 |

|                                   |            |            |            |       |
|-----------------------------------|------------|------------|------------|-------|
| Duration till follow-up<br>(days) | 343.8±34.6 | 346.9±27.0 | 342.2±38.3 | 0.603 |
|-----------------------------------|------------|------------|------------|-------|

BMI- body mass index; SpO<sub>2</sub> - peripheral oxygen saturation; WBC - white blood cells; NLR-neutrophil lymphocyte ratio; CRP- C reactive protein; LDH - lactate dehydrogenase; FU- follow up; ICU- intensive care unit

Table S2. Univariable analysis for persistent dyspnea one year following COVID-19

| Table 2                                        |                      |             |         |
|------------------------------------------------|----------------------|-------------|---------|
| Parameter                                      | Univariable analysis |             |         |
|                                                | OR                   | 95% CI      | P value |
| Age                                            | 0.995                | 0.951-1.042 | 0.833   |
| Gender (male)                                  | 0.602                | 0.207-1.756 | 0.353   |
| Diastolic blood pressure                       | 1.055                | 1.004-1.108 | 0.033   |
| Temperature                                    | 1.848                | 1.078-3.169 | 0.026   |
| E/A                                            | 0.082                | 0.007-1.030 | 0.053   |
| LV GLS                                         | 1.321                | 1.004-1.738 | 0.047   |
| GCW                                            | 0.998                | 0.997-1.000 | 0.035   |
| GWI                                            | 0.998                | 0.997-1.000 | 0.040   |
| Normal lung function at 6 months<br>spirometry | 0.346                | 0.118-0.346 | 0.053   |

LV GLS - left ventricle global longitudinal work; GCW- global constructive work; GWI-global work index
